# Supplementary material
Source: PubMed Central journal article supplement (PMC2535609)

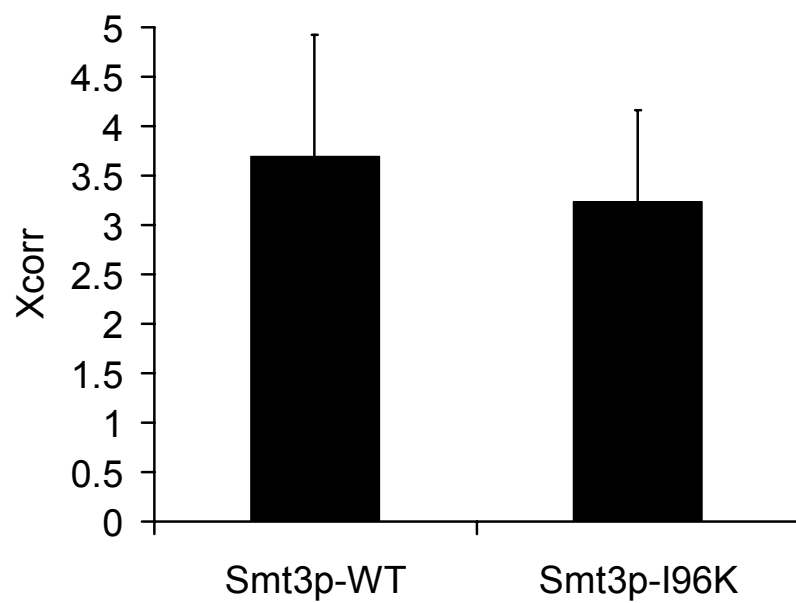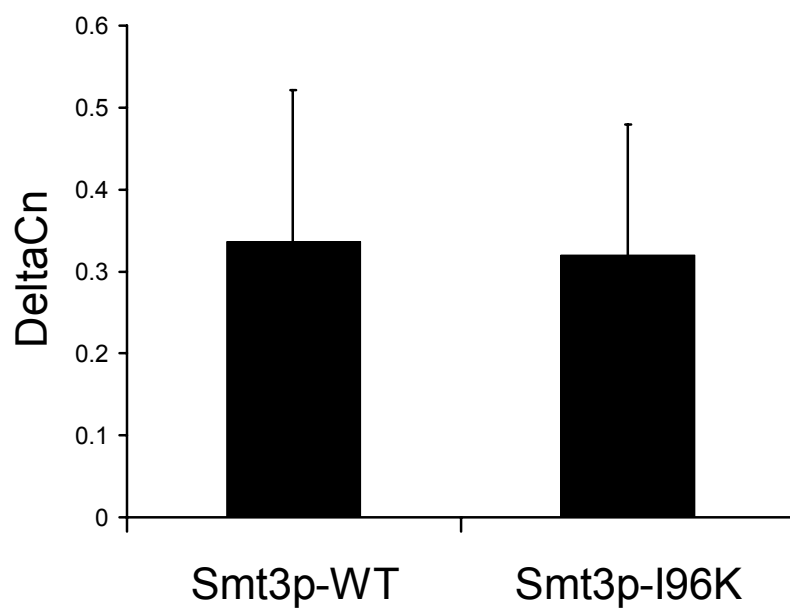

Figure S1

Supplement: NIHMS64123-supplement-1si20060223_02.pdf [file NIHMS64123-supplement-1si20060223_02.pdf]
